# Supplementary material for: Fibronectin is a stress responsive gene regulated by HSF1 in response to geldanamycin
Source: PubMed Central journal article supplement (PMC5732156; doi:10.1038/s41598-017-18061-y), 2017-12-15
Supplement: 41598_2017_18061_MOESM1_ESM.pdf [file 41598_2017_18061_MOESM1_ESM.pdf]

**Fibronectin is a stress responsive gene regulated by HSF1 in response to geldanamycin**

Karim Colin Hassan Dhanani, William John Samson, Adrienne Lesley Edkins\*

Biomedical Biotechnology Research Unit (BioBRU), Department of Biochemistry and Microbiology,  
Rhodes University, Grahamstown, 6140.

\*Corresponding author [a.edkins@ru.ac.za](mailto:a.edkins@ru.ac.za)

Supplementary data file

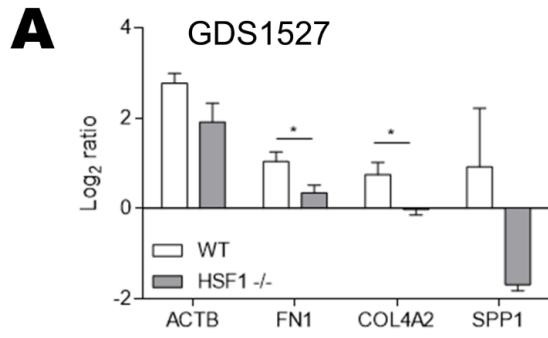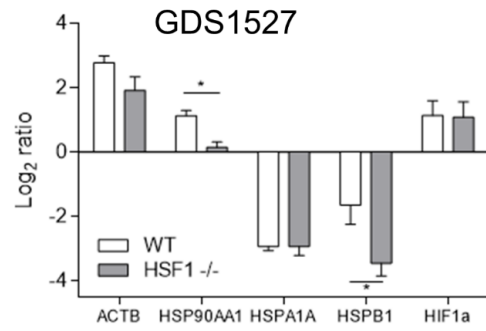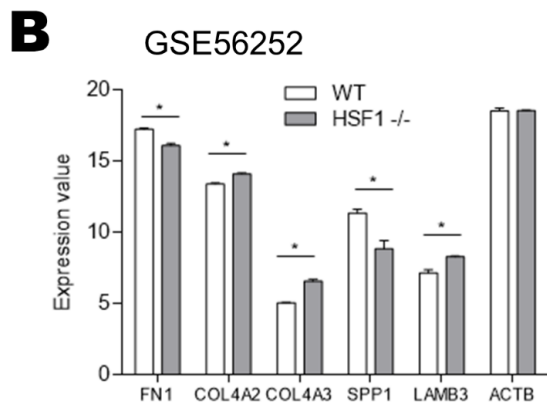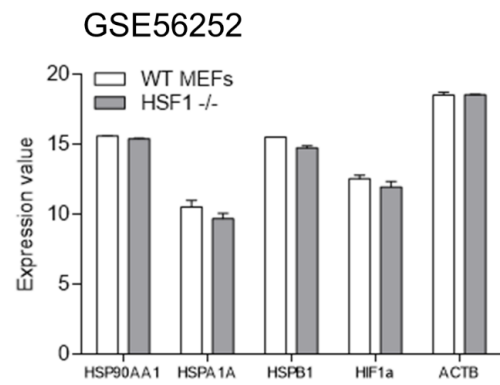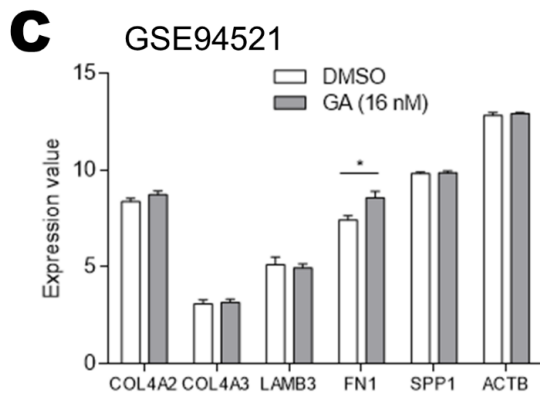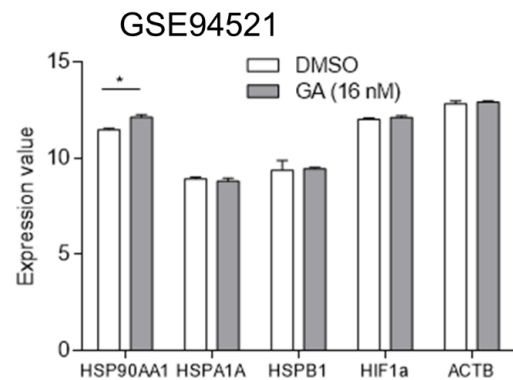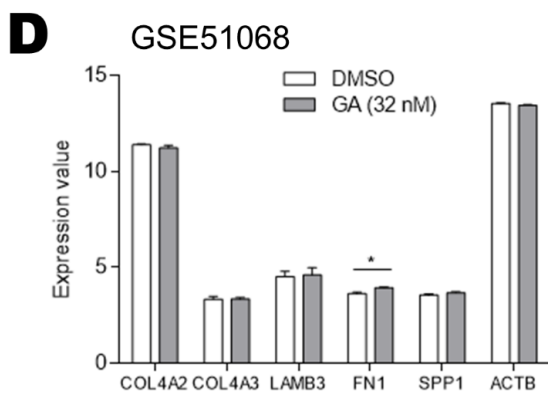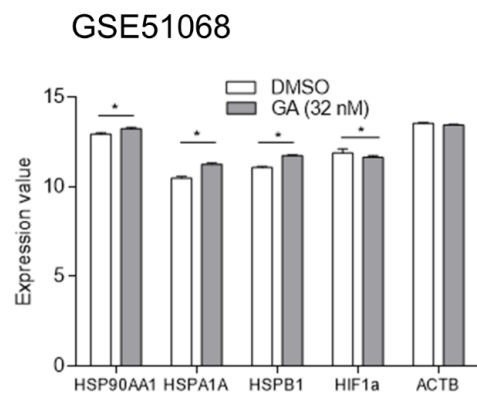

**Supplementary Figure 1: Expression levels of ECM and known stress-inducible genes from published gene expression datasets.**

Data shown are average values for multiple probes against the relevant gene. GEO datasets were accessed via the NCBI database using the following accession codes: A) GDS1527 HSF+/+ MEF compared to HSF-/- MEF<sup>42</sup>, B) GSE56252, HSF+/+ MEF compared to HSF-/- MEF<sup>47</sup>, C) GSE94521, H9-Gll1hESC treated with DMSO or 16 nM GA<sup>49</sup>, D) GSE51068, OCI-LY3 B-cell lymphoma treated with DMSO or 32 nM GA<sup>48</sup>. Statistical significance was determined by unpaired two-tailed Student t-tests comparing the control to the test sample for each gene (\*p<0.05).
